# Supplementary material
Source: Springer Nature journal article supplement (https://www.springermedizin.de/resource/supplementary/12936_2013_3707_MOESM1_ESM.pdf/9545166)
Supplement: MOESM1 [file 9545166]

**A G3 only (uninfected)**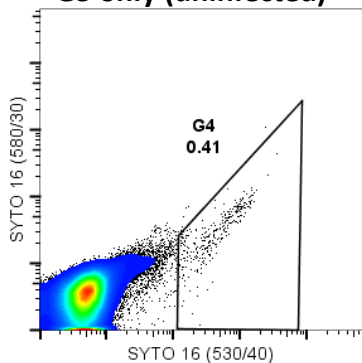**B G3 only (infected)**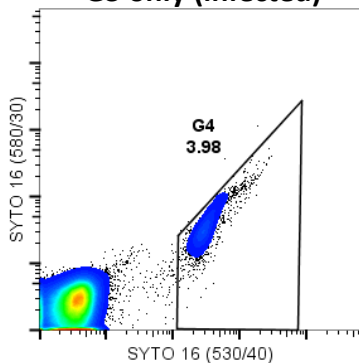**C G3 only (uninfected)**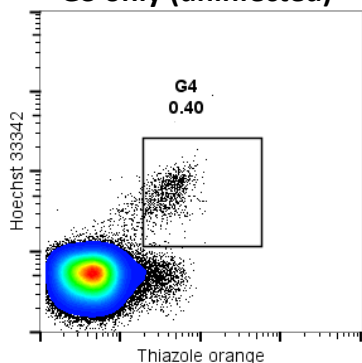**D G3 only (infected)**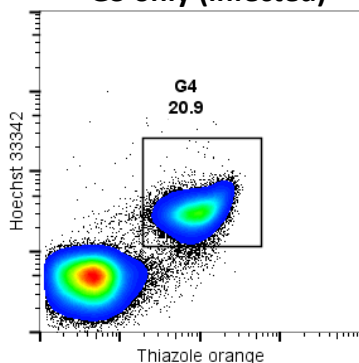**E G3 only (uninfected)**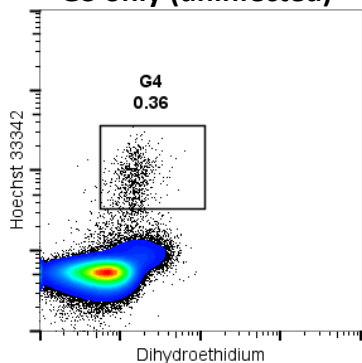**F G3 only (infected)**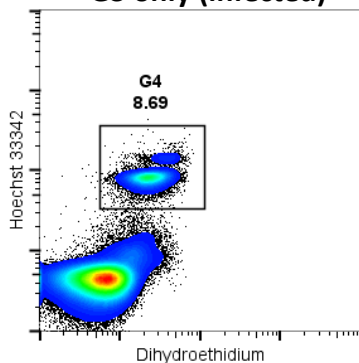**Additional file 1 – Background staining using nucleic acid-specific dyes**

Background staining of HJ-RBCs in uninfected mice was observed when using the nucleic acid-specific dyes SYTO 16 (A), Thiazole orange (C) and Dihydroethidium (E). These populations were indistinguishable from parasitized cells in equivalent samples from infected mice (B, D, and F)
